# Supplementary material for: Markerless Escherichia coli rrn Deletion Strains for Genetic Determination of Ribosomal Binding Sites
Source: PubMed Central journal article supplement (PMC4683628; doi:10.1534/g3.115.022301), 2015-10-04
Supplement: supp_g3.115.022301_022301SI.pdf [file supp_g3.115.022301_022301SI.pdf]

## **Markerless *Escherichia coli* *rrn* Deletion Strains for Genetic Determination of Ribosomal Binding Sites**

Selwyn Quan<sup>\*</sup>, Ole Skovgaard<sup>†</sup>, Robert E. McLaughlin<sup>‡</sup>, Ed T. Buurman<sup>‡,1</sup>, and Catherine L. Squires<sup>§</sup>

<sup>\*</sup>Department of Biology, Stanford University, Stanford, California 94305, <sup>†</sup>Department of Science, Systems and Models, Roskilde University, Roskilde, Denmark DK-4000, <sup>‡</sup>Department of Biosciences, Infection Innovative Medicines Unit, AstraZeneca R&D Boston, Waltham, Massachusetts 02451 and <sup>§</sup>Department of Molecular Biology and Microbiology, Tufts University School of Medicine, Boston, Massachusetts 02111;

<sup>1</sup>Corresponding author: Pfizer Vaccine Research and Development, 401 North Middletown Road, Pearl River, New York 10964; E-mail: Ed.Buurman@pfizer.com

**Table S1** Strains and plasmids used in this work

| Strain  | Genotype                              | Source/Reference                |
|---------|---------------------------------------|---------------------------------|
| MG1655  | <i>ilvG rfb-50 rph-1</i>              | Blattner <i>et al.</i> 1997     |
| SQ11    | $\Delta rrnE::KmR$                    | This work                       |
| SQ16    | $\Delta rrnB::KmR$                    | This work                       |
| SQ20    | $\Delta rrnG::KmR$                    | This work                       |
| SQ22    | $\Delta rrnA::KmR$                    | This work                       |
| SQ24    | $\Delta rrnD::KmR$                    | This work                       |
| SQ26    | $\Delta rrnH::KmR$                    | This work                       |
| SQ34    | $\Delta rrnC::KmR$                    | This work                       |
| SQ37    | $\Delta rrnE$                         | This work                       |
| SQ40    | $\Delta rrnEG$                        | This work                       |
| SQ49    | $\Delta rrnGBA$                       | This work                       |
| SQ53    | $\Delta rrnGBAD$                      | This work                       |
| SQ2062  | $\Delta rrnGBAD(ptRNA67)$             | This work                       |
| SQ2066  | $\Delta rrnGBAD(pK4-16)$              | This work                       |
| SQ2200  | $\Delta rrnGBAD(pK4-16, ptRNA67)$     | This work                       |
| SQ78    | $\Delta rrnGADE$                      | This work                       |
| SQ2068  | $\Delta rrnGADE(pK4-16)$              | This work                       |
| SQ2197  | $\Delta rrnGADE(pK4-16, ptRNA67)$     | This work                       |
| SQ2199  | $\Delta rrnGADE(ptRNA67)$             | This work                       |
| SQ88    | $\Delta rrnGADEH(ptRNA67)$            | This work                       |
| SQ2196  | $\Delta rrnGADEH(pK4-16, ptRNA67)$    | This work                       |
| SQ110   | $\Delta rrnGADBHC(ptRNA67)$           | This work                       |
| SQ2194  | $\Delta rrnGADBHC(pK4-16, ptRNA67)$   | This work                       |
| SQ141   | $\Delta rrnGADEHB(pKK3535, ptRNA67)$  | This work                       |
| SQ2202  | $\Delta rrnGADEHB(pK4-16, ptRNA67)$   | This work                       |
| SQ2203  | $\Delta rrnGADEHB(ptRNA67)$           | This work                       |
| SQ171   | $\Delta rrnGADEHBC(pKK3535, ptRNA67)$ | This work                       |
| SQ2158  | $\Delta rrnGADEHBC(pK4-16, ptRNA67)$  | This work                       |
| Plasmid |                                       |                                 |
| pKK3535 | pBR322 ori, <i>rrnB</i>               | Brosius <i>et al.</i> 1981      |
| pK4-16  | pSC101 ori, <i>rrnB</i>               | This work                       |
| ptRNA67 |                                       | Zaporjets <i>et al.</i> 2003    |
| pKD46   |                                       | Datsenko and Wanner 2000        |
| pCP20   |                                       | Cherepanov and Wackernagel 1995 |
| pKD13   |                                       | Datsenko and Wanner 2000        |

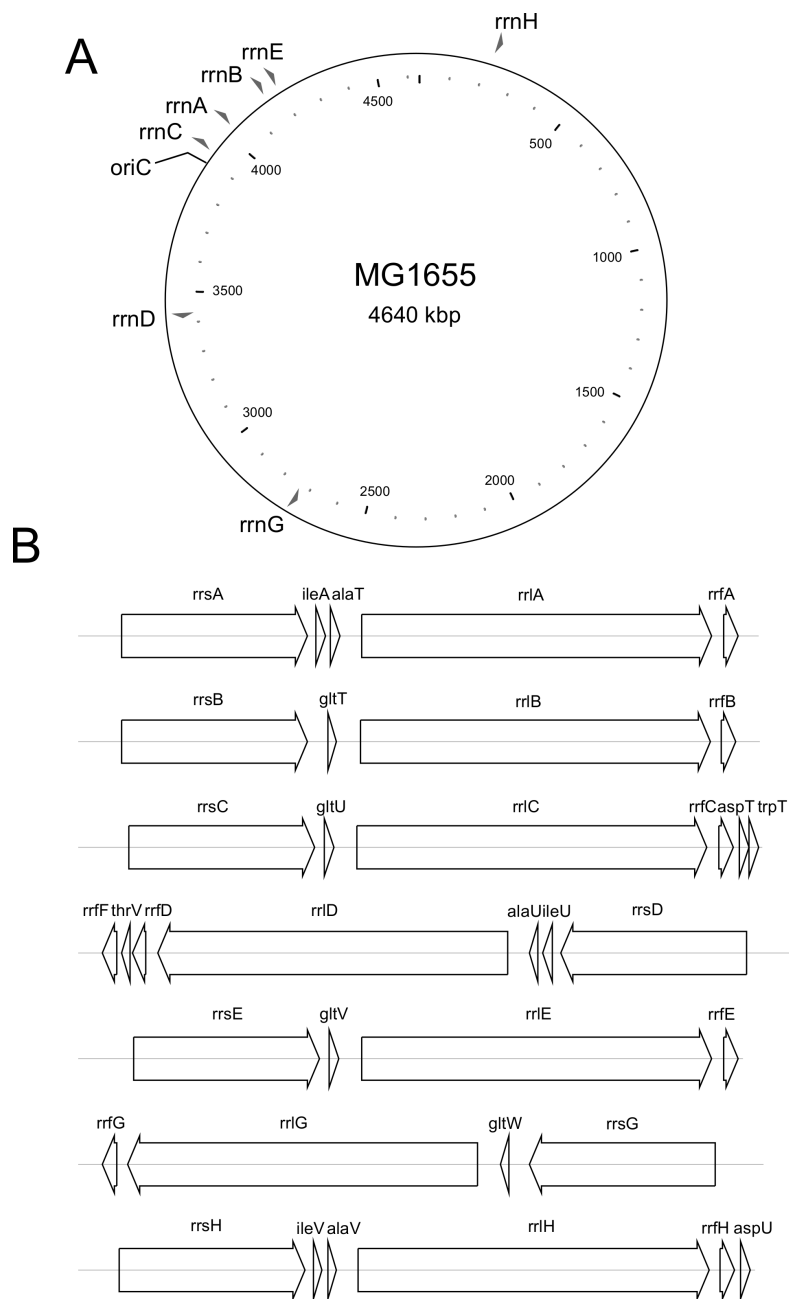

**Figure S1** Extent of the deletion of each *E. coli* ribosomal RNA operon mapped with respect to Genbank version U00096.2 of the *E. coli* genomic sequence.

rrnA

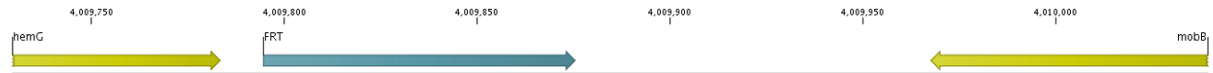

4035164..4040815

GCGAATTTTCGCCCAGAAATCGCCCATTTAACCGACAAACCGACGCTGAAATAAGCATAAAG  
 AATGTGTAGGCTGGAGCTGCTTCGAAGTTCCTATACTTTCTAGAGAATAGGAACTTCGAACT  
 GCAGGTTCGACGGATCCCCGGAATAGAAAGGCCATCCTGACGGATGGCCTTTTTTGCATTGGCGC  
 AGAAAAAATGCCGGATGCGACGCTGGCGCGTCTTATCCAGCCTACTCTTGCTTATCCGTTT  
 TGCTTTTGCATCCACTCCACCACAAAATCAGCCAGCCCCTCAACATCATTAATATCCAGTAA

rrnB

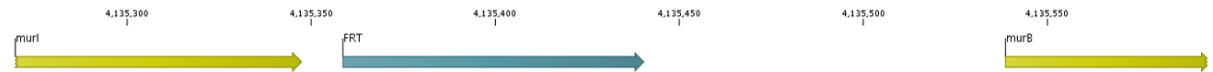

4166298..4171959

CCAGGAGCTGAACAATTATTGCCCGTTTTACAGCGTTACGGCTTCGAAACGCTCGAAAACT  
 GGCAGTTTTAGGCTGATTTGGTTGAATGTGTAGGCTGGAGCTGCTTCGAAGTTCCTATACTT  
 TCTAGAGAATAGGAACTTCGAACTGCAGGTTCGACGGATCCCCGGAATTTTTTGCGTTTCTAC  
 AAAC'TCTTCCTGTCGTCATATCTACAAGCCATCCCCCACAGATACGGTAAACTAGCCTCGT  
 TTTTGCATCAGGAAAGCAGCTATGAACCACTCCTTAAAACCCTGGAACACATTTGGCATTGA  
 TCATAATGCTCAGC

rrnC

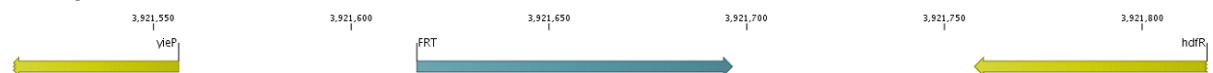

3941387..3947067

AAGTTTTTCTGTGCAGCTAACTGTTGTGCGCTTAAAGGCATTACTTATCTTCCTTTTTTCTT  
 TTTATTCCTCCTTAGTATGCCACCAGGAAGTGTGATTACGTGTAGGCTGGAGCTGCTTCGAA  
 GTTCCTATACTTTCTAGAGAATAGGAACTTCGAACTGCAGGTTCGACGGATCCCCGGAATATC  
 TGAAATAACCCTCTCCGAAGTAAATCCTTCTACCGGCATCCTTGCCAGCCATTCATATTAAT  
 ACAC'TTCATCCAGCACGTTAATTTTTCAAAGATCGCGAATCAACGCATTTTTTAT

rrnD

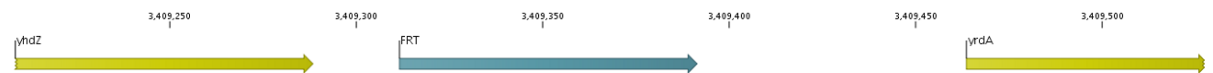

3423217..3429164

AGCAAGCTGCACCTGATGAATTTTTTGCGCATCCTAAATCAGAGCGTACGAGGGCATTTTTA  
 TCGCAGGTAATCCATTAATTGAATGTTAGTTCGAAAAGCAAGTGTAGGCTGGAGCTGCTTCG  
 AAGTTCCTATACTTTCTAGAGAATAGGAACTTCGAACTGCAGGTTCGACGGATCCCCGGAATA  
 CTAAAAGACTTGCACAAGGCCAATAATGCCCCAAAGTCATTAGTAAATCATTTATTGCTGA  
 GGTAAGTATGTCTGATGTTTTACGCCCATACCGCGATCTTTTTCCACAAATCGGTCAGCGCG  
 TAATGATCG

rrnE

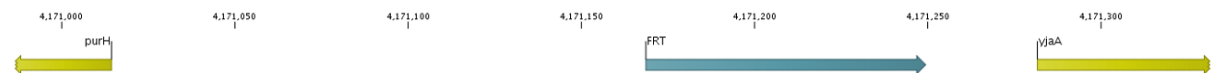

4207686..4213202

CGCGGCGGACTGGACGACGTTGTTGCATGGTAAATCCCCTGGATTTGACTATTACAGAGAGC  
 GTTAGCTGAATTTTTTCGCGAAAACTCAGCTAACGCCCTAACGGGGCATCCTTATTTTTTCG  
 CCCGCATTGTAACGAAAACGTTTGCGCAACGCTCGCGAATTTTTCTCTTTCAATGGTGGTGT  
 AGGCTGGAGCTGCTTCGAAGTTCCTATACTTTCTAGAGAATAGGAACTTCGGAATAGGAACT

AAGGAGGATATTCATATGTCAATTATTTGCATGATGAAGGGAATCTCATGTCAGTTCTGTAT  
ATCCAAATTCGTCGTAATCAAATTACTGTTTCGCGA

rrnG

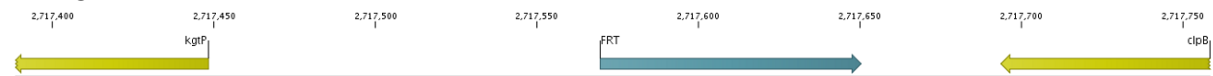

2725867..2731558

GCGGCGACGAGTATCACTACTTGTCTGCTGTCTGCCGTTACAGTACTTTTCAGCCATGC  
CATTATGTCTCCTGCCGTAATCCGATGCTTTTGTCTCGGTCGCTTTTGTATTTTTTTTGTAA  
AGGAAATATTATACATTTGTTGCATATCATTATGCAACCTTAACCATGAATTTAGTTGTGTA  
GGCTGGAGCTGCTTCGAAGTTCCTATACTTTCTAGAGAATAGGAACTTCGAACTGCAGGTCG  
ACGATCCCCGGAATACTTATAGACAAAAACGAGCCCCGAAGGGCTCGTTTTATCATTACT  
GGACGGCGACAATCCGGTCTTCATTAACTTCCAGGCGAATCACTTTACCCGGAACCAATT

rrnH

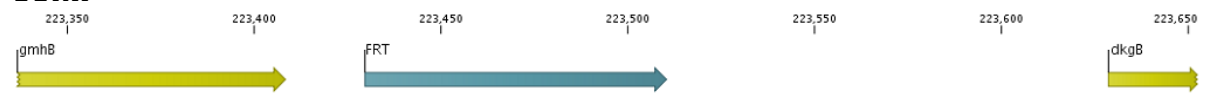

223429..229049

GCGGATTGGGTGTTAAATAGCCTGGCAGACCTGCCGCAAGCGATAAAAAAGCAGCAAAAACC  
GGCACAATGATTAAAAGATGAGCGGTTGAAAGTGTAGGCTGGAGCTGCTTCGAAGTTCCTAT  
ACTTTCTAGAGAATAGGAACTTCGAACTGCAGGTCGACGGATCCCCGGAATGTATATCTATT  
ATTGCCAGAATCGAAAAATCCTCTGCATTTTACGCTCTTTTTTCTCAACAGTCTGAAGCCC  
ATAATCACCTCAGTTAACGAAAATAGCATTAAAAGAGGCATATTATGGCTATCCCTGCATTT  
GGTTTA

**Figure S2** Schematic representation and sequence of FRT scar and regions flanking the *rrn* deletions. The FRT scar sequence is denoted as underlined text. The coordinates of the deleted regions are provided above the sequence data. Coordinates are based on the sequence of *E. coli* MG1655 (NC000913; modification date 19-Mar-2014).

A

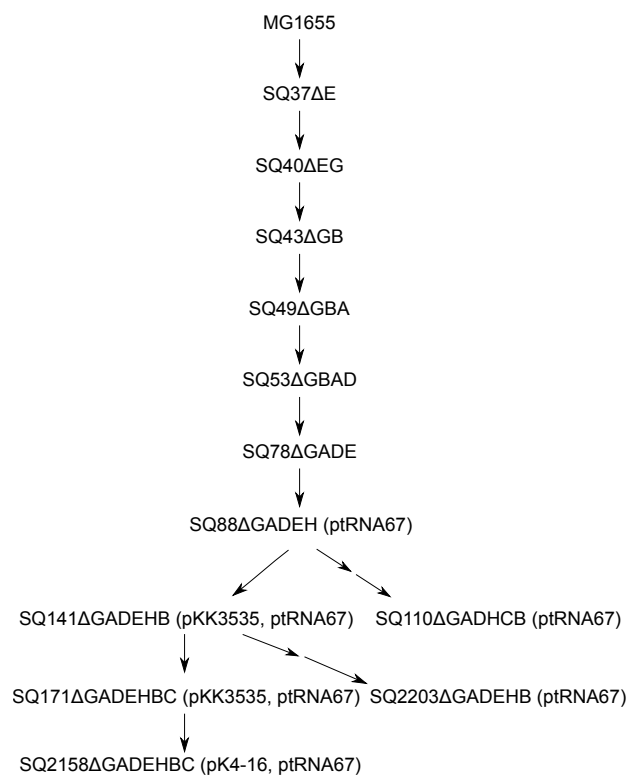

B

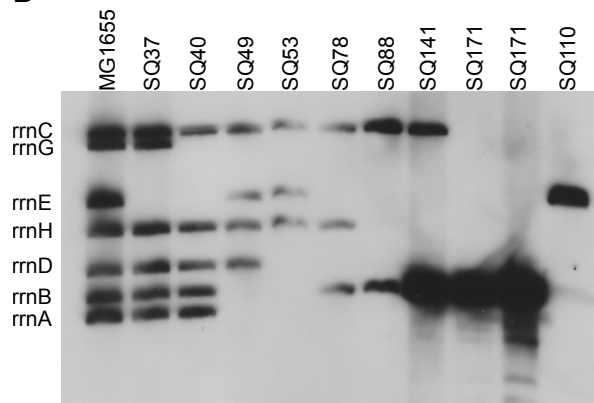

**Figure S3** Knockout strategy of *rrn* operons in *E. coli* MG1655. (A) Order of ribosomal deletions to generate an *E. coli* strain with no chromosomal rRNA operons. (B) Confirmation of the *rrn* deletions by Southern blot using a 600 bp *rrs* probe.

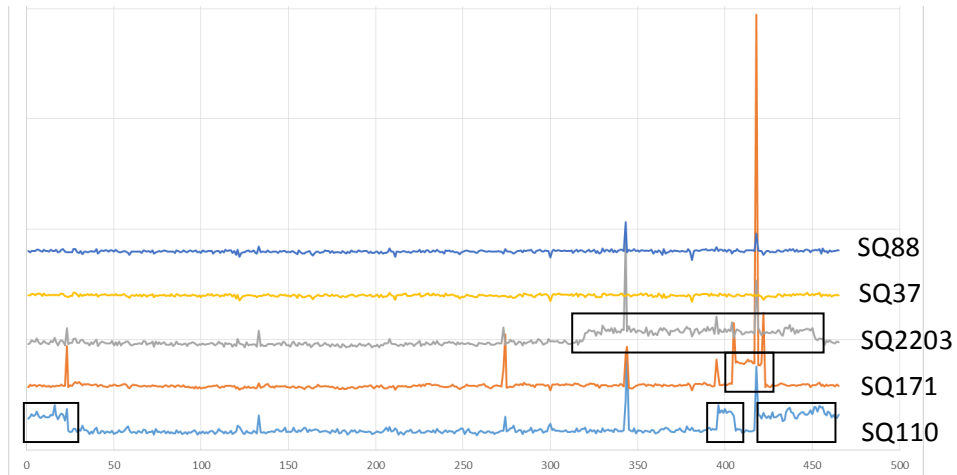

**Figure S4** Relative sequence read coverage of indicated strains mapped against *E. coli* MG1655 (GenBank reference NC000913). The plot represents the average read density over 10kb windows normalized to the average genome coverage. Regions of duplication are represented by ~2x relative coverage and indicated as boxed areas on the plot. 'Spikes' in the plots represent resident plasmids, containing regions with homology to the genomic DNA, incl. tRNA and rRNA regions.

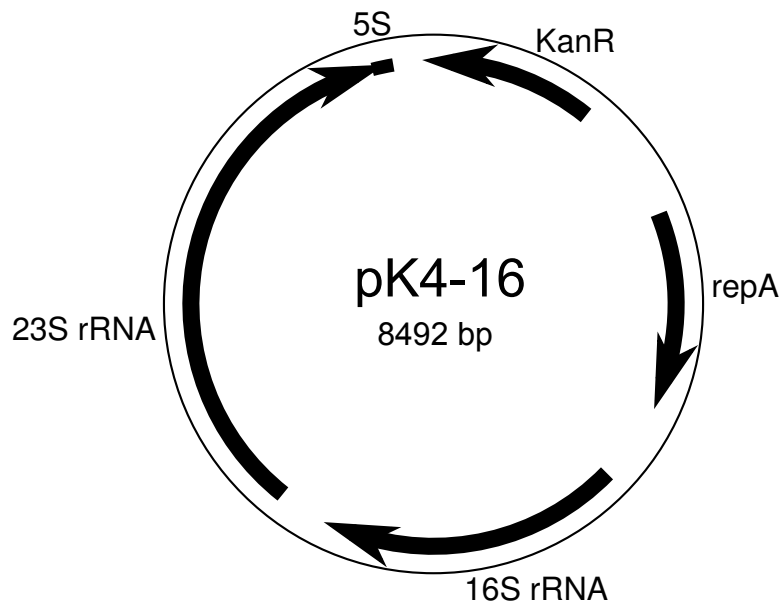

**Figure S5** Schematic diagram of pK4-16 (*rrnB* plasmid with pSC101 ori)



**File S1**  
**References Supporting Information**

Blattner FR, Plunkett G, Bloch CA, Perna NT, V. Burland *et al.*, 1997 The complete genomic sequence of *Escherichia coli* K-12. *Science* 277: 1453-1474.

Brosius, J., A. Ullrich, M. A. Raker, A. Gray, T. J. Dull *et al.*, 1981 Construction and fine mapping of recombinant plasmids containing the *rrnB* ribosomal RNA operon of *E. coli*. *Plasmid* 6: 112-118.

Cherepanov, P. P., and W. Wackernagel, 1995 Gene disruption in *Escherichia coli*: TcR and KmR cassettes with the option of Flp-catalyzed excision of the antibiotic-resistance determinant. *Gene* 158: 9–14

Datsenko, K. A., and B. L. Wanner, 2000 One-step inactivation of chromosomal genes in *Escherichia coli* K-12 using PCR products. *Proc. Natl. Acad. Sci. USA* 97: 6640-6645.

Zaporojets, D., S. French, and C. L. Squires, 2003 Products transcribed from rearranged *rrn* genes of *Escherichia coli* can assemble to form functional ribosomes. *J. Bacteriol.* 185: 6921-6927.
