# Supplementary material for: Markerless Escherichia coli rrn Deletion Strains for Genetic Determination of Ribosomal Binding Sites
Source: PubMed Central journal article supplement (PMC4683628; doi:10.1534/g3.115.022301), 2015-10-04
Supplement: supp_g3.115.022301_FigureS1.pdf [file supp_g3.115.022301_FigureS1.pdf]

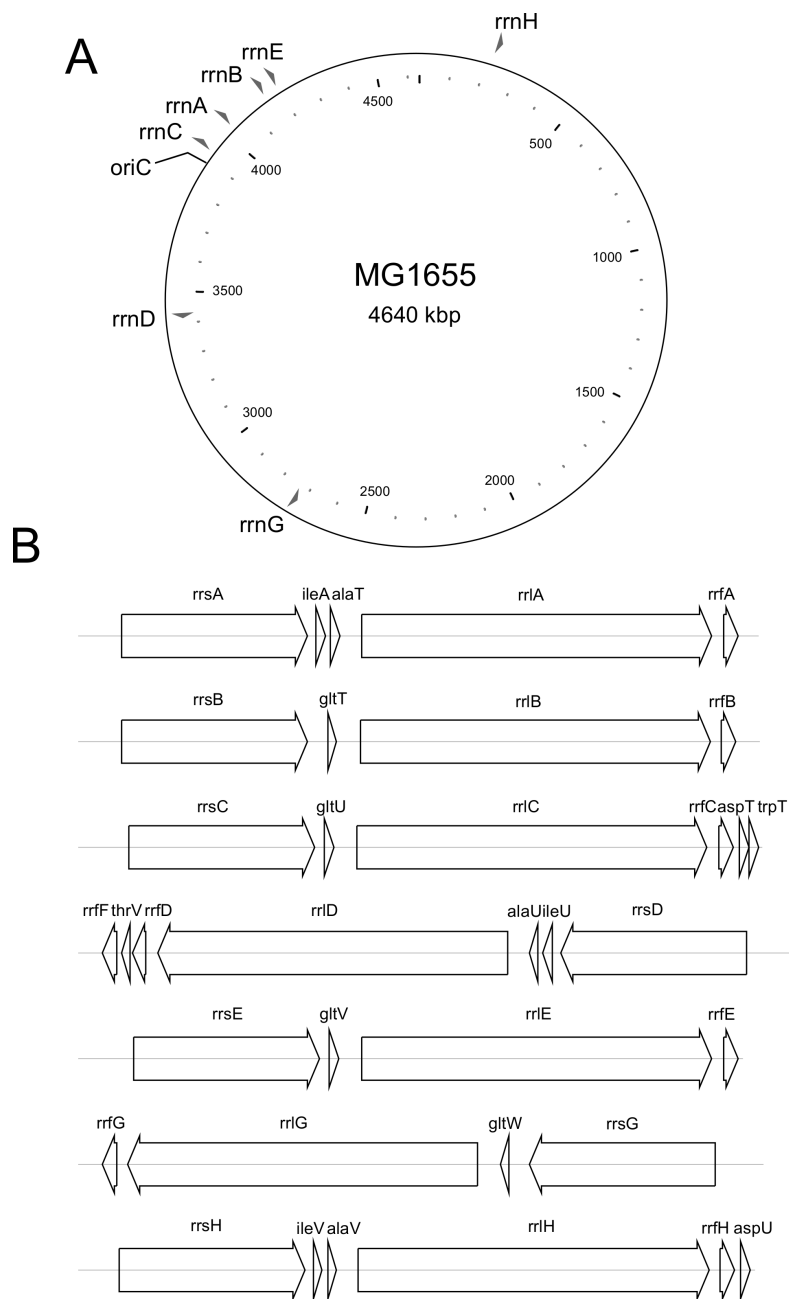

**Figure S1** Extent of the deletion of each *E. coli* ribosomal RNA operon mapped with respect to Genbank version U00096.2 of the *E. coli* genomic sequence.
