# Supplementary material for: Markerless Escherichia coli rrn Deletion Strains for Genetic Determination of Ribosomal Binding Sites
Source: PubMed Central journal article supplement (PMC4683628; doi:10.1534/g3.115.022301), 2015-10-04
Supplement: supp_g3.115.022301_FigureS2.pdf [file supp_g3.115.022301_FigureS2.pdf]

rrnA

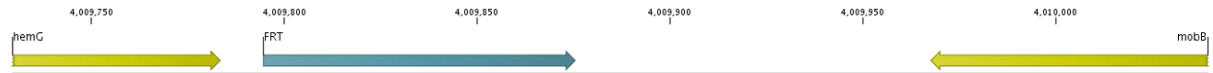

4035164..4040815

GCGAATTTTCGCCCGAGAAATCGCCCATTTAACCGACAAACCGACGCTGAAATAAGCATAAAG  
 AATGTGTAGGCTGGAGCTGCTTCGAAGTTCCTATACTTTCTAGAGAATAGGAACTTCGAACT  
 GCAGGTTCGACGGATCCCCGGAATAGAAGGCCATCCTGACGGATGGCCTTTTTTGCATTGGCGC  
 AGAAAAAATGCCGGATGCGACGCTGGCGCGTCTTATCCAGCCTACTCTTGCTTATCCGTTT  
 TGCTTTTTGCATCCACTCCACCACAAAATCAGCCAGCCCCTCAACATCATTAATATCCAGTAA

rrnB

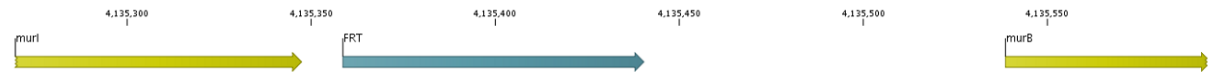

4166298..4171959

CCAGGAGCTGAACAATTATTGCCCGTTTTACAGCGTTACGGCTTCGAAACGCTCGAAAACT  
 GGCAGTTTTAGGCTGATTTGGTTGAATGTGTAGGCTGGAGCTGCTTCGAAGTTCCTATACTT  
 TCTAGAGAATAGGAACTTCGAACTGCAGGTTCGACGGATCCCCGGAATTTTTTTCGTTTTCTAC  
 AAAC'TCTTCCTGTCGTCATATCTACAAGCCATCCCCCACAGATACGGTAAACTAGCCTCGT  
 TTTTGCATCAGGAAAGCAGCTATGAACCACTCCTTAAAACCCTGGAACACATTTGGCATTGA  
 TCATAATGCTCAGC

rrnC

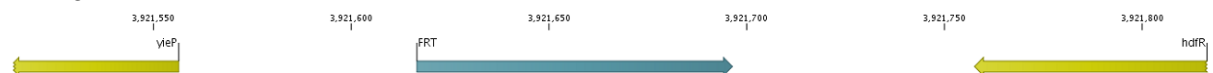

3941387..3947067

AAGTTTTTCTGTGCAGCTAACTGTTGTGCGCTTAAAGGCATTACTTATCTTCCTTTTTTCTT  
 TTTATTCCTCCTTAGTATGCCACCAGGAAGTGTGATTACGTGTAGGCTGGAGCTGCTTCGAA  
 GTTCCTATACTTTCTAGAGAATAGGAACTTCGAACTGCAGGTTCGACGGATCCCCGGAATATC  
 TGAAATAACCCTCTCCGAAGTAAATCCTTCTACCGGCATCCTTGCCAGCCATTCATATTAAT  
 ACAC'TTCATCCAGCACGTTAATTTTTCAAAGATCGCGAATCAACGCATTTTTTAT

rrnD

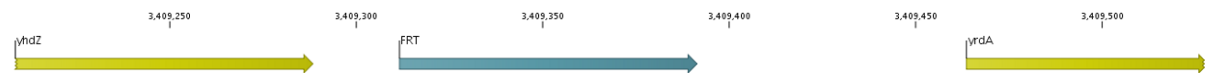

3423217..3429164

AGCAAGCTGCACCTGATGAATTTTTTTCGCGATCCTAAATCAGAGCGTACGAGGGCATTTTTA  
 TCGCAGGTAATCCATTAATTGAATGTTAGTTCGAAAAGCAAGTGTAGGCTGGAGCTGCTTCG  
 AAGTTCCTATACTTTCTAGAGAATAGGAACTTCGAACTGCAGGTTCGACGGATCCCCGGAATA  
 CTAAAAGACTTGCACAAGCCAATAATGCCCCCAAAGTCATTAGTAAATCATTTATTGCTGA  
 GGTAAGTATGTCTGATGTTTTACGCCCATACCGCGATCTTTTTCCACAAATCGGTCAGCGCG  
 TAATGATCG

rrnE

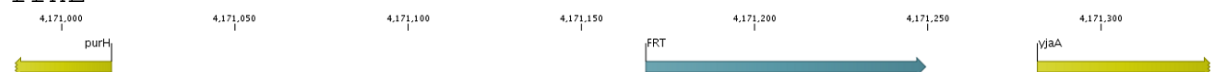

4207686..4213202

CGCGGCGGACTGGACGACGTTGTTGCATGGTAAATCCCCTGGATTTGACTATTACAGAGAGC  
 GTTAGCTGAATTTTTTCGCGAAAACTCAGCTAACGCCCTAACGGGGCATCCTTATTTTTTCG  
 CCCGCATTGTAACGAAAACGTTTGCGCAACGCTCGCGAATTTTTTCTCTTTCAATGGTGGTGT  
 AGGCTGGAGCTGCTTCGAAGTTCCTATACTTTCTAGAGAATAGGAACTTCGGAATAGGAACT

AAGGAGGATATTCATATGTCAATTATTTGCATGATGAAGGGAATCTCATGTCAGTTCTGTAT  
ATCCAAATTCGTCGTAATCAAATTACTGTTTCGCGA

rrnG

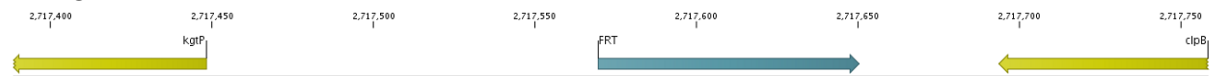

2725867..2731558

GCGGCGACGAGTATCACTACTTGTCTGCTGTCTGCCGTTACAGTACTTTTCAGCCATGC  
CATTATGTCTCCTGCCGTAATCCGATGCTTTTGTCTCGGTCGCTTTTGTATTTTTTTTGTAA  
AGGAAATATTATACATTTGTTGCATATCATTATGCAACCTTAACCATGAATTTAGTTGTGTA  
GGCTGGAGCTGCTTCGAAGTTCCTATACTTTCTAGAGAATAGGAACTTCGAACTGCAGGTCG  
ACGATCCCCGGAATACTTATAGACAAAAACGAGCCCCGAAGGGCTCGTTTTATCATTACT  
GGACGGCGACAATCCGGTCTTCATTAACCTCCAGGCGAATCACTTTACCCGGAACCAATT

rrnH

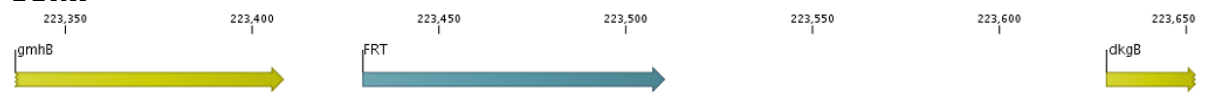

223429..229049

GCGGATTGGGTGTTAAATAGCCTGGCAGACCTGCCGCAAGCGATAAAAAAGCAGCAAAAACC  
GGCACAATGATTAAAAGATGAGCGGTTGAAAGTGTAGGCTGGAGCTGCTTCGAAGTTCCTAT  
ACTTTCTAGAGAATAGGAACTTCGAACTGCAGGTCGACGGATCCCCGGAATGTATATCTATT  
ATTGCCAGAATCGAAAAATCCTCTGCATTTTACGCTCTTTTTTCTCAACAGTCTGAAGCCC  
ATAATCACCTCAGTTAACGAAAATAGCATTAAAAGAGGCATATTATGGCTATCCCTGCATTT  
GGTTTA

**Figure S2** Schematic representation and sequence of FRT scar and regions flanking the *rrn* deletions. The FRT scar sequence is denoted as underlined text. The coordinates of the deleted regions are provided above the sequence data. Coordinates are based on the sequence of *E. coli* MG1655 (NC000913; modification date 19-Mar-2014).
