# Supplementary material for: Markerless Escherichia coli rrn Deletion Strains for Genetic Determination of Ribosomal Binding Sites
Source: PubMed Central journal article supplement (PMC4683628; doi:10.1534/g3.115.022301), 2015-10-04
Supplement: supp_g3.115.022301_FigureS3.pdf [file supp_g3.115.022301_FigureS3.pdf]

A

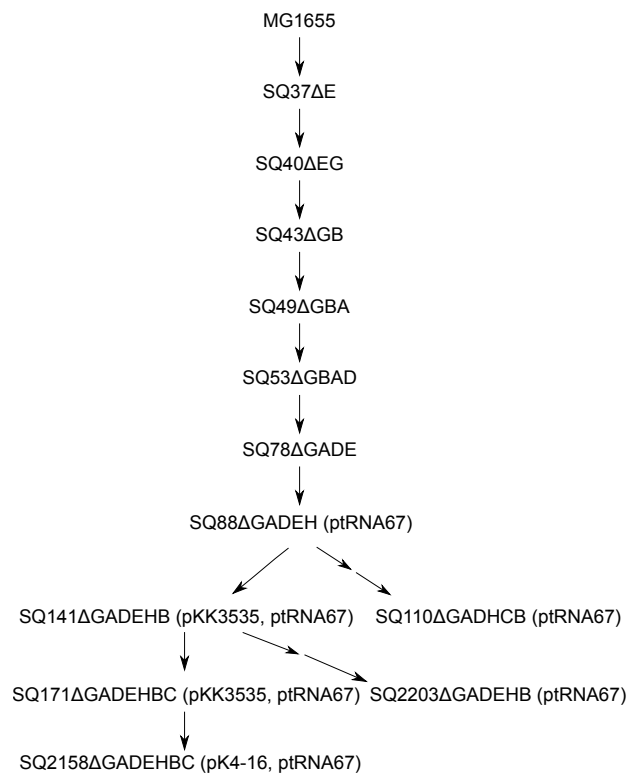

B

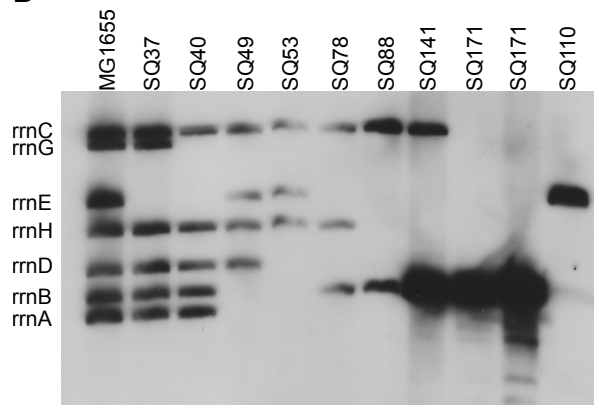

**Figure S3** Knockout strategy of *rrn* operons in *E. coli* MG1655. (A) Order of ribosomal deletions to generate an *E. coli* strain with no chromosomal rRNA operons. (B) Confirmation of the *rrn* deletions by Southern blot using a 600 bp *rrs* probe.
