# Supplementary material for: Markerless Escherichia coli rrn Deletion Strains for Genetic Determination of Ribosomal Binding Sites
Source: PubMed Central journal article supplement (PMC4683628; doi:10.1534/g3.115.022301), 2015-10-04
Supplement: supp_g3.115.022301_FigureS5.pdf [file supp_g3.115.022301_FigureS5.pdf]

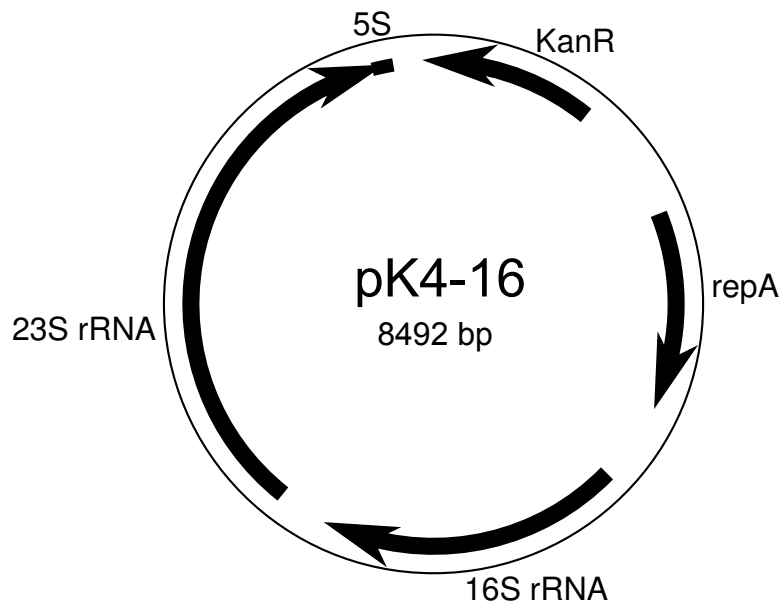

**Figure S5** Schematic diagram of pK4-16 (*rrnB* plasmid with pSC101 ori)
