# Supplementary material for: Markerless Escherichia coli rrn Deletion Strains for Genetic Determination of Ribosomal Binding Sites
Source: PubMed Central journal article supplement (PMC4683628; doi:10.1534/g3.115.022301), 2015-10-04
Supplement: supp_g3.115.022301_FileS1.pdf [file supp_g3.115.022301_FileS1.pdf]

**File S1**  
**References Supporting Information**

Blattner FR, Plunkett G, Bloch CA, Perna NT, V. Burland *et al.*, 1997 The complete genomic sequence of *Escherichia coli* K-12. *Science* 277: 1453-1474.

Brosius, J., A. Ullrich, M. A. Raker, A. Gray, T. J. Dull *et al.*, 1981 Construction and fine mapping of recombinant plasmids containing the *rrnB* ribosomal RNA operon of *E. coli*. *Plasmid* 6: 112-118.

Cherepanov, P. P., and W. Wackernagel, 1995 Gene disruption in *Escherichia coli*: TcR and KmR cassettes with the option of Flp-catalyzed excision of the antibiotic-resistance determinant. *Gene* 158: 9–14

Datsenko, K. A., and B. L. Wanner, 2000 One-step inactivation of chromosomal genes in *Escherichia coli* K-12 using PCR products. *Proc. Natl. Acad. Sci. USA* 97: 6640-6645.

Zaporojets, D., S. French, and C. L. Squires, 2003 Products transcribed from rearranged *rrn* genes of *Escherichia coli* can assemble to form functional ribosomes. *J. Bacteriol.* 185: 6921-6927.
