# Supplementary material for: Markerless Escherichia coli rrn Deletion Strains for Genetic Determination of Ribosomal Binding Sites
Source: PubMed Central journal article supplement (PMC4683628; doi:10.1534/g3.115.022301), 2015-10-04
Supplement: supp_g3.115.022301_TableS1.pdf [file supp_g3.115.022301_TableS1.pdf]

**Table S1** Strains and plasmids used in this work

| Strain         | Genotype                              | Source/Reference                |
|----------------|---------------------------------------|---------------------------------|
| MG1655         | <i>ilvG rfb-50 rph-1</i>              | Blattner <i>et al.</i> 1997     |
| SQ11           | $\Delta rrnE::KmR$                    | This work                       |
| SQ16           | $\Delta rrnB::KmR$                    | This work                       |
| SQ20           | $\Delta rrnG::KmR$                    | This work                       |
| SQ22           | $\Delta rrnA::KmR$                    | This work                       |
| SQ24           | $\Delta rrnD::KmR$                    | This work                       |
| SQ26           | $\Delta rrnH::KmR$                    | This work                       |
| SQ34           | $\Delta rrnC::KmR$                    | This work                       |
| SQ37           | $\Delta rrnE$                         | This work                       |
| SQ40           | $\Delta rrnEG$                        | This work                       |
| SQ49           | $\Delta rrnGBA$                       | This work                       |
| SQ53           | $\Delta rrnGBAD$                      | This work                       |
| SQ2062         | $\Delta rrnGBAD(ptRNA67)$             | This work                       |
| SQ2066         | $\Delta rrnGBAD(pK4-16)$              | This work                       |
| SQ2200         | $\Delta rrnGBAD(pK4-16, ptRNA67)$     | This work                       |
| SQ78           | $\Delta rrnGADE$                      | This work                       |
| SQ2068         | $\Delta rrnGADE(pK4-16)$              | This work                       |
| SQ2197         | $\Delta rrnGADE(pK4-16, ptRNA67)$     | This work                       |
| SQ2199         | $\Delta rrnGADE(ptRNA67)$             | This work                       |
| SQ88           | $\Delta rrnGADEH(ptRNA67)$            | This work                       |
| SQ2196         | $\Delta rrnGADEH(pK4-16, ptRNA67)$    | This work                       |
| SQ110          | $\Delta rrnGADBHC(ptRNA67)$           | This work                       |
| SQ2194         | $\Delta rrnGADBHC(pK4-16, ptRNA67)$   | This work                       |
| SQ141          | $\Delta rrnGADEHB(pKK3535, ptRNA67)$  | This work                       |
| SQ2202         | $\Delta rrnGADEHB(pK4-16, ptRNA67)$   | This work                       |
| SQ2203         | $\Delta rrnGADEHB(ptRNA67)$           | This work                       |
| SQ171          | $\Delta rrnGADEHBC(pKK3535, ptRNA67)$ | This work                       |
| SQ2158         | $\Delta rrnGADEHBC(pK4-16, ptRNA67)$  | This work                       |
| <b>Plasmid</b> |                                       |                                 |
| pKK3535        | pBR322 ori, <i>rrnB</i>               | Brosius <i>et al.</i> 1981      |
| pK4-16         | pSC101 ori, <i>rrnB</i>               | This work                       |
| ptRNA67        |                                       | Zaporjets <i>et al.</i> 2003    |
| pKD46          |                                       | Datsenko and Wanner 2000        |
| pCP20          |                                       | Cherepanov and Wackernagel 1995 |
| pKD13          |                                       | Datsenko and Wanner 2000        |
